# Supplementary material for: Ascarosides coordinate the dispersal of a plant-parasitic nematode with the metamorphosis of its vector beetle
Source: PubMed Central journal article supplement (PMC4974635; doi:10.1038/ncomms12341), 2016-08-01
Supplement: ncomms12341-s1.pdf [file ncomms12341-s1.pdf]

## Supplementary Figures

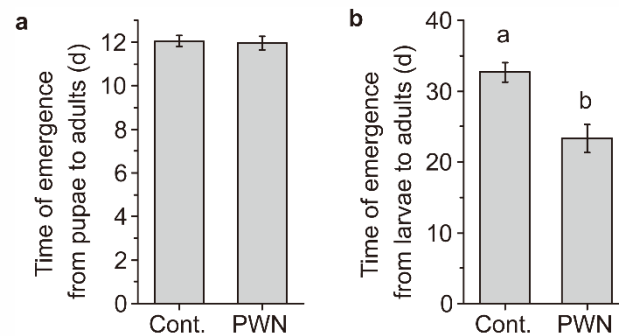

**Supplementary Figure 1. The effect of numerous nematodes on the time to emergence of the beetle.** (a) The effect of numerous dispersal L<sub>III</sub> larvae on the time to emergence of the beetle from the larval stage to the adult stage (n = 20). Values are expressed as mean  $\pm$  s.e.m. of three independent experiments. (b) The effect of numerous dispersal L<sub>III</sub> larvae on the time to emergence of the beetle from the pupal stage to the adult stage (n = 20). Values are expressed as mean  $\pm$  s.e.m. of three independent experiments. The significance level was set at  $\alpha = 0.05$  and significant differences between groups are indicated with different letters, and statistical significance was set at a level of  $P < 0.001$  (independent sample *t*-test). PWN: pinewood nematodes.

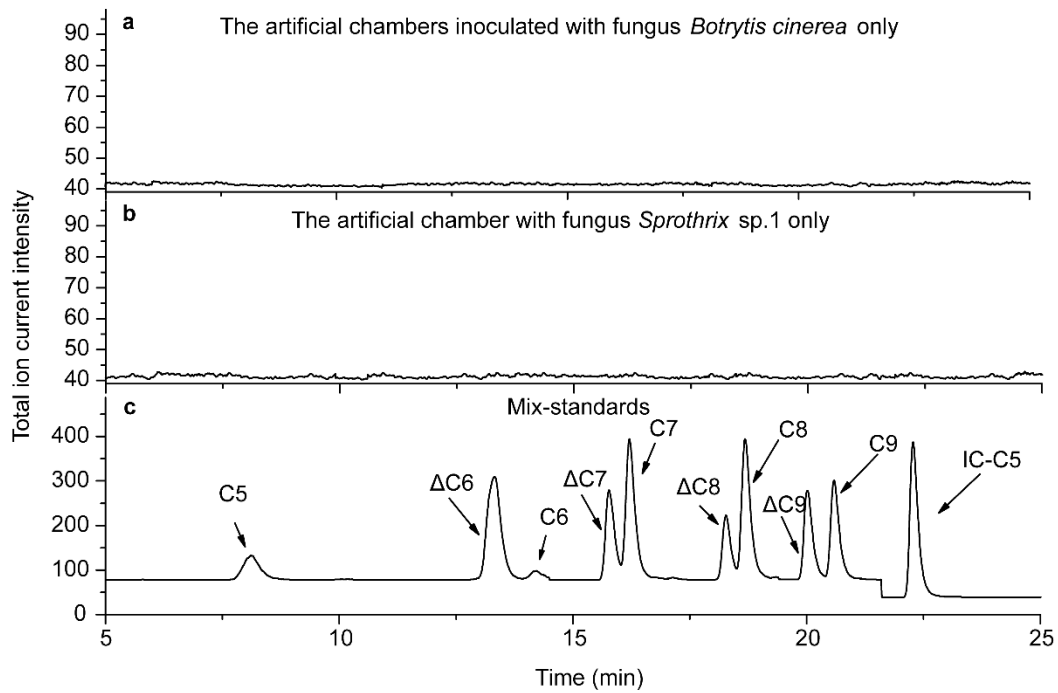

**Supplementary Figure 2. Analysis of ascarosides in the artificial chambers. (a)** The artificial chambers inoculated with fungus *B. cinerea* only. **(b)** The artificial chambers inoculated with *Sporothrix* sp. 1 only. **(c)** The mix-standards were as control.

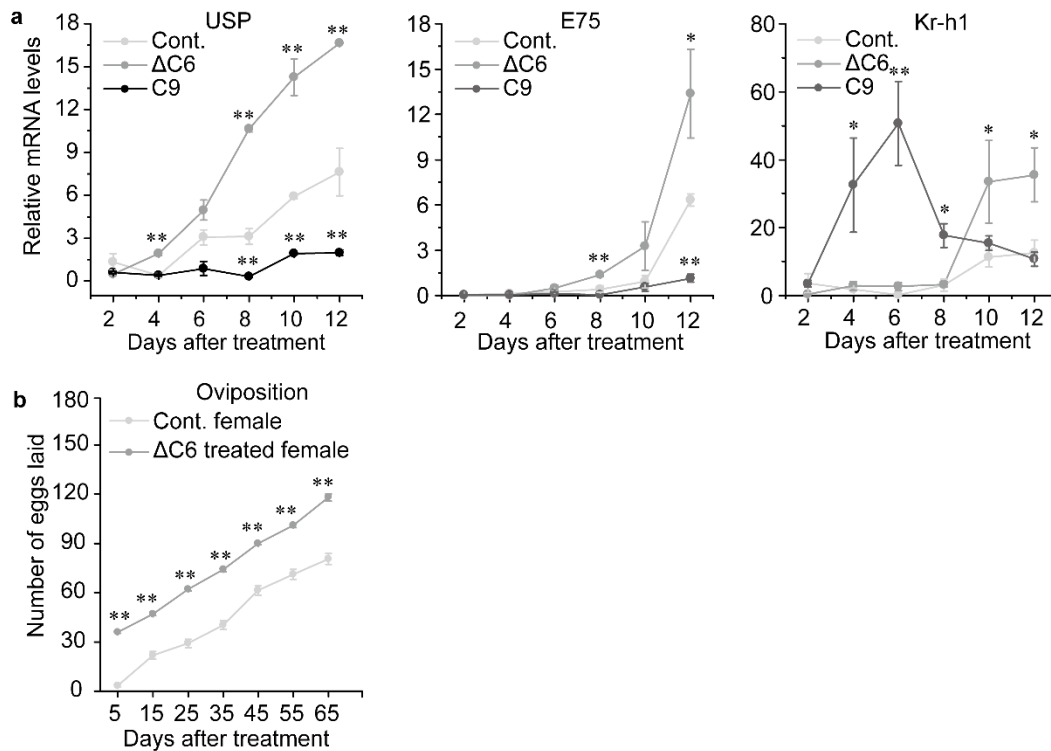

**Supplementary Figure 3. Effects of *asc-ΔC6* and *asc-C9* on the ecdysone and JH signaling pathway and on the fecundity of the beetle. (a) Effects of *asc-ΔC6* and *asc-C9* on mRNA abundance of *USP* (left), *E75* (middle), and *Kr-h1* (right). Values are expressed as mean  $\pm$  s.e.m. of three independent experiments. \*  $P < 0.05$  versus control and \*\*  $P < 0.01$  versus control (student's *t*-test, unpaired, two-tailed). (b) Numbers of eggs per female for females that had been either treated or not treated with *asc-ΔC6* ( $n = 20$ ). *Asc-ΔC6* was tested at 3.97 nM (the concentration in each natural chamber with about 5000 dispersal third-stage nematode larvae L<sub>III</sub>). (\*\*  $P < 0.01$ , multiple comparisons). Values are expressed as mean  $\pm$  s.e.m. of three independent experiments. \*\*  $P < 0.01$  versus control (student's *t*-test, unpaired, two-tailed).**

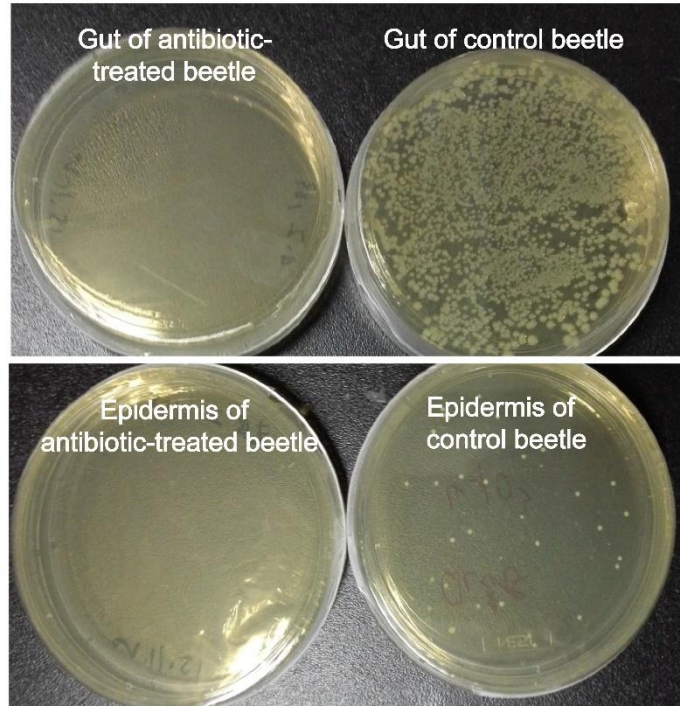

**Supplementary Figure 4. Bacterial colonies from the gut and epidermis of beetles raised in the presence and absence of antibiotics.**

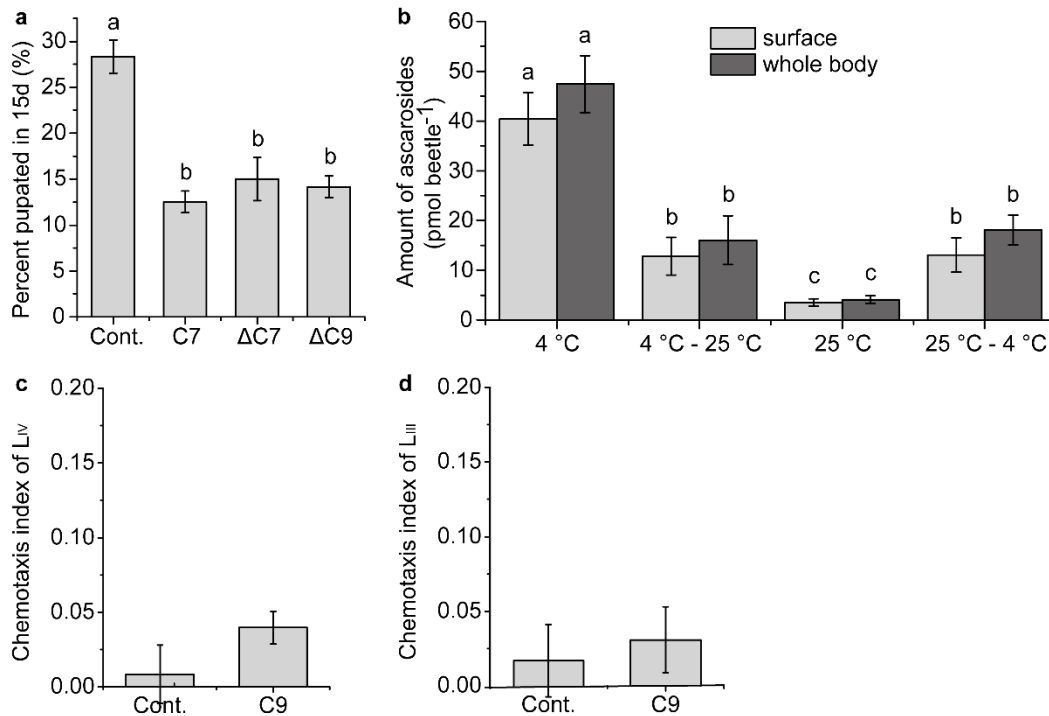

**Supplementary Figure 5. Effects of ascarosides produced by the beetle internally on beetle development and the effects of beetle-produced asc-C9 on the behavior of L<sub>IV</sub> and L<sub>III</sub> PWN larvae.** (a) Effects of ascarosides produced by the beetle on the time required to develop from the larval to pupal stage. Asc-C7, asc-ΔC7 and asc-ΔC9 were applied at 0.05 nM (the concentration in each beetle larva at 4 °C) (n = 20). Values are expressed as mean ± s.e.m. of three independent experiments. The data were analyzed using the one-way ANOVA test ( $F_{3, 19} = 355.55$ ,  $P < 0.001$ ), *Post hoc* pairwise comparison were done using Bonferroni test. Labels with different letters are significantly different at  $P = 0.05$ . (b) The amount of asc-C9 on the surface and in the whole body of the beetle grown at different temperatures (n = 20). Values are expressed as mean ± s.e.m. of three independent experiments. The data were analyzed using the one-way ANOVA test ( $F_{3, 4} = 8.73$ ,  $P < 0.001$ ), *Post hoc* pairwise comparison were done using Bonferroni test. Labels with different letters are significantly different at  $P = 0.05$ . (c) Effects of asc-C9 at the same concentrations as produced by a natural chamber on the chemotaxis index of dispersal forth-stage nematode L<sub>IV</sub> (n = 10).

Values are expressed as mean  $\pm$  s.e.m. of three independent experiments. **(d)** Effects of asc-C9 at the same concentrations as produced by one newly eclosed adult beetle on the chemotaxis index of dispersal third-stage nematode L<sub>III</sub> larvae (n = 10). Values are expressed as mean  $\pm$  s.e.m. of three independent experiments. The significance level was set at  $\alpha = 0.05$  and were not significant.

Supplementary Tables

Supplementary Table 1. Abiotic conditions and beetle development at field sites.

|                                                                                           | Annual<br>average<br>temp.<br>(°C) | Annual<br>average<br>rainfall<br>(mm) | Latitude,<br>Longitude   | Elevation | Number of<br>PWN L <sub>III</sub><br>larvae<br>around<br>each<br>chamber | Percent<br>pupation<br>on 15-Apr.<br>(%) | Emergence<br>time of adults                     |
|-------------------------------------------------------------------------------------------|------------------------------------|---------------------------------------|--------------------------|-----------|--------------------------------------------------------------------------|------------------------------------------|-------------------------------------------------|
| Infested site 1<br>(Tianwang Mountain)<br>Host: <i>Pinus tabuliformis</i><br>Carrière     | 13.9                               | 500                                   | N 33° 68',<br>E 109° 1'  | 1000 m    | 6879.3*<br>±34.09                                                        | 19.02<br>±0.86                           | 30-Apr., 2013<br>30-Apr., 2014<br>1-May, 2015   |
| Infested site 2<br>(Xiuping Mountain)<br>Host: <i>Pinus tabuliformis</i><br>Carrière      | 13.4                               | 741.9                                 | N 33°25',<br>E 109° 8'   | 1300 m    | 8168<br>±29.92                                                           | 23.93<br>±0.57                           | 30-Apr., 2013<br>28-Apr., 2014<br>30-Apr., 2015 |
| Uninfested site 1<br>(Yuan Mountain)<br>Host: <i>Pinus tabuliformis</i><br>Carrière       | 12.2                               | 804.4                                 | N 33° 23',<br>E 109° 26' | 850m      | 0                                                                        | 0                                        | 10-May, 2013<br>7-May, 2014<br>8-May, 2015      |
| Uninfested site 2<br>(Fengtuling Mountain)<br>Host: <i>Pinus tabuliformis</i><br>Carrière | 12.8                               | 804.8                                 | N 32° 03',<br>E 109° 15' | 830 m     | 0                                                                        | 0                                        | 7-May, 2013<br>9-May, 2014<br>10-May, 2015      |

\* n=30 samples per group and three independent experiments.

**Supplementary Table 2. Primers used for quantification of the specific mRNAs.**

| <b>mRNA</b>                   | <b>Forward primers (5'-3')</b> | <b>Reverse primers (5'-3')</b> |
|-------------------------------|--------------------------------|--------------------------------|
| $\beta$ actin                 | TGGGTATGGAATCTTGCGGT           | GGCGGTGATTCCTTTTGCA            |
| Kruppel homolog 1 (Kr-h1)     | TTGCCGCAAATCTCACAGGA           | TTCGAACACTCCGGAAAGCT           |
| Methoprene-tolerant (Met)     | ACTGGGCGGTTCGTTTTGTTA          | ACCACCCAGAAGCAACGATT           |
| HMG CoA synthase              | TCACTCTCGTCACTTGCAGT           | TTTCCCAGCTGACACTCCAT           |
| EcR                           | TACGGACAACAGTTTCGCGA           | ACACTTCTGCCGGACAATGT           |
| USP                           | AGGCGCATAAACGGTGAGTA           | ATTGGTTCGCCGAACACATTG          |
| E75                           | TCAGCGGTGTCAATGAACGA           | TTTCGAGGCGGTTTGAATGC           |
| insulin receptor 1            | CAAGGCAGCTTTGGAATGGT           | GGCAGTGTCAAAGCCTTCA            |
| insulin receptor 2            | CCAATCTCCCATCAAAGGCG           | TCGTCTGGATTTGAGCAGGT           |
| c-Jun N-terminal kinase (JNK) | CAGTCTGATTCTGCGGTTGG           | CCTACGTTTCATCCGCAAGTG          |
| vitellogenin 1                | TGCTCAGAGGCTTCAGTGAA           | CGCTTCCGTCAATTATCCGG           |
| vitellogenin 2                | AGGCCCTCTCTTTGAATCCC           | TTCTGCATCCTCCCACCATT           |
| carboxypeptidase              | TGCCCGAACCTCCATACATT           | AAGTTAGTCGCCGCCAAATC           |
| CP AP1-2                      | TGCCGGTTCTGTTCTGTTTC           | ACCATAGTCCCTGCCTTCAC           |
| CP RR1-5                      | TAAGGCGAGGCTGTTTACCT           | TGGTTCAGGAGCGTATGGTT           |
| CP RR2-3                      | CCTCAAATCTCCTCCAGCCT           | TGTTAAAGTGCGCGCTACTC           |
| CP RR2-8                      | GCTGACGAGTTGATCACCAC           | AACCACCAGCACCAAGAAAC           |
| CP RR2-11                     | TCTTTGGCGGCTTTGACTTC           | AGGCTGGAGGAGATTTGAGG           |
| CP CFC-5                      | TGACCTACTCCATGGGCTTG           | CAACAACGATGCCCAACAGA           |
| Tweedle                       | TGATTCCACCGATTCCACCA           | TCCCCATCGGCTATTCCTTC           |
